# Supplementary material for: A Novel CRISPR/Cas9 Screening Potential Index for Prognostic and Immunological Prediction in Low-Grade Glioma
Source: Front Genet. 2022 Apr 25;13:839884. doi: 10.3389/fgene.2022.839884 (PMC9109250; doi:10.3389/fgene.2022.839884)
Supplement: Supplementary file 4 [file Table4.XLSX]

## Sheet: uniCox
gene	HR	HR.95L	HR.95H	pvalue
TOMM40	2.03998	1.53524	2.71064	8.83825e-07
MED8	3.26146	2.30152	4.62177	2.9997e-11
NCAPG	1.72955	1.50305	1.99017	2.00786e-14
NOP2	1.67124	1.31649	2.12159	2.45716e-05
NOP16	1.83791	1.33413	2.53192	0.000196307
MED31	2.3818	1.70142	3.33426	4.27033e-07
DHDDS	3.21979	2.22264	4.66429	6.26056e-10
DHX15	2.31474	1.72494	3.10623	2.22988e-08
PDRG1	2.67494	1.9537	3.66244	8.37494e-10
EIF3I	2.2813	1.69721	3.0664	4.6172e-08
UPF2	0.576526	0.431437	0.770408	0.000196536
SDAD1	2.30313	1.6115	3.29161	4.6751e-06
HAUS5	2.09621	1.65787	2.65045	6.2709e-10
TONSL	1.72198	1.39226	2.12978	5.39871e-07
TIPIN	2.17364	1.5474	3.05331	7.5359e-06
ANAPC1	2.25493	1.48122	3.43279	0.000149331
RPS24	0.622275	0.528294	0.732975	1.35785e-08
POLR2I	1.46457	1.23221	1.74075	1.49814e-05
RAN	1.70885	1.30421	2.23904	0.000101754
WDR77	2.87666	2.11938	3.90451	1.21161e-11
RPA3	2.23244	1.83361	2.71802	1.26704e-15
RCC1	1.60613	1.3014	1.98223	1.01424e-05
RACGAP1	1.82742	1.4846	2.24939	1.28714e-08
TRMT112	1.66339	1.25866	2.19827	0.000347364
DDX56	1.82654	1.42027	2.34904	2.68898e-06
POLR2E	1.98882	1.42067	2.78419	6.18539e-05
CDC37	1.93713	1.41142	2.65864	4.25461e-05
POLR2H	1.55357	1.20575	2.00173	0.000657218
HSPA5	1.72958	1.36852	2.18589	4.51698e-06
TRRAP	1.96605	1.42921	2.70453	3.25515e-05
RPL37	0.706508	0.603625	0.826926	1.51402e-05
TOP2A	1.44576	1.29899	1.60911	1.48483e-11
HSPE1	1.56591	1.2728	1.92653	2.22373e-05
HNRNPL	2.30771	1.6573	3.21335	7.39019e-07
TXNL4B	1.92622	1.48597	2.4969	7.36504e-07
NUP85	2.26904	1.72176	2.99028	5.9463e-09
CHEK1	2.0242	1.67228	2.45018	4.59431e-13
CDC42	2.08786	1.62155	2.68826	1.14127e-08
WDR3	1.65294	1.27404	2.14454	0.00015488
CDC6	1.93957	1.62821	2.31047	1.1692e-13
GEMIN5	2.07314	1.37364	3.12885	0.000517262
RFC5	2.01739	1.48225	2.74573	8.10356e-06
SNRPD2	1.53773	1.29987	1.81912	5.19752e-07
POLA2	1.92354	1.54759	2.39081	3.7271e-09
RPL3	0.499689	0.404903	0.616664	1.01535e-10
INCENP	2.01295	1.51103	2.68159	1.74532e-06
POLR2F	0.61984	0.510071	0.753231	1.51257e-06
PSMA7	2.21961	1.6333	3.0164	3.49005e-07
ETF1	2.91681	1.94482	4.37459	2.26187e-07
CDC45	1.57183	1.36198	1.81401	6.19039e-10
MAK16	2.31794	1.62805	3.30017	3.10462e-06
TRAPPC8	1.91581	1.31499	2.79115	0.000708732
HEATR1	1.92786	1.42148	2.61463	2.41986e-05
HAUS8	2.1076	1.69004	2.62833	3.64034e-11
POLR3H	0.420969	0.313004	0.566174	1.05106e-08
LRR1	2.29826	1.79118	2.9489	6.03612e-11
CRCP	2.63434	1.89052	3.6708	1.05182e-08
NDC80	1.68428	1.46323	1.93873	3.79495e-13
SEC61A1	2.12445	1.59905	2.82247	2.01082e-07
UBA1	2.00444	1.37219	2.928	0.000322593
RPA1	2.68442	1.90977	3.7733	1.31383e-08
ACTL6A	2.04343	1.58967	2.62671	2.43272e-08
EIF6	1.76114	1.34815	2.30065	3.31009e-05
USP39	1.89395	1.32598	2.70521	0.000446261
CDC73	1.79363	1.28117	2.51106	0.000665751
SPC24	1.59433	1.38887	1.83019	3.436e-11
POLE	1.79845	1.44338	2.24086	1.69174e-07
PLK1	1.8255	1.53729	2.16774	6.65138e-12
RPAP2	2.64792	1.81403	3.86515	4.50936e-07
WDR46	1.63408	1.27348	2.09679	0.00011323
POLE2	2.20077	1.73018	2.79936	1.30879e-10
RPS12	0.723206	0.619067	0.844863	4.40611e-05
RPL31	0.739761	0.633907	0.86329	0.000130367
UTP15	3.27486	2.2516	4.76315	5.4288e-10
RFC3	2.0538	1.62153	2.6013	2.38894e-09
TRAPPC3	2.11866	1.57125	2.85678	8.52851e-07
COPB2	2.00567	1.4368	2.79977	4.32248e-05
DNAJC8	1.98608	1.49589	2.63689	2.08794e-06
RRM2	1.55852	1.37421	1.76755	4.83571e-12
HAUS3	2.16894	1.46189	3.21797	0.000119824
GPN1	2.30625	1.72221	3.08836	2.04042e-08
PSMD11	2.31712	1.56106	3.43935	3.0449e-05
PRPF31	2.04847	1.59418	2.63223	2.07809e-08
NAA50	2.02218	1.48505	2.75358	7.80456e-06
CENPK	2.01441	1.69765	2.39029	1.03158e-15
POLR2L	1.62508	1.36846	1.92982	3.07498e-08
RNPC3	1.56768	1.2652	1.94248	3.94576e-05
EIF2B3	2.52753	1.73893	3.67374	1.17591e-06
CDC20	1.6032	1.42681	1.80139	2.07676e-15
CCT6A	1.76281	1.51739	2.04793	1.24869e-13
MCM6	2.02024	1.61614	2.52538	6.58329e-10
INTS3	1.78553	1.27863	2.4934	0.00066756
RPS23	0.676297	0.554888	0.82427	0.000106945
SRSF1	1.87202	1.36903	2.55982	8.58814e-05
POLR3C	2.25456	1.47755	3.44017	0.000162811
POLD1	1.79332	1.50194	2.14123	1.07407e-10
SNRPB	1.7349	1.38019	2.18078	2.34691e-06
CACTIN	2.55274	1.73374	3.75862	2.05769e-06
TOP3A	2.54613	1.75946	3.68455	7.18208e-07
CPSF4	2.60093	1.92847	3.50788	3.78035e-10
MAD2L1	1.67907	1.40633	2.00471	1.00273e-08
GAPDH	1.62562	1.331	1.98545	1.91069e-06
ESPL1	1.80599	1.53726	2.12171	6.42799e-13
MED14	1.80111	1.31915	2.45916	0.000212838
DONSON	2.23529	1.72477	2.89692	1.19805e-09
CDC7	1.58474	1.28626	1.9525	1.53063e-05
PSMD6	1.98495	1.38578	2.84318	0.000184333
SMC4	2.24328	1.91542	2.62727	1.21947e-23
INTS8	1.86007	1.334	2.59361	0.000253186
LSG1	1.82073	1.29766	2.55463	0.00052459
THOC2	1.79509	1.33681	2.41047	0.000100198
CRNKL1	1.95888	1.40369	2.73367	7.6787e-05
NUP205	1.83835	1.43015	2.36305	2.00655e-06
SLC39A7	1.92508	1.40905	2.63008	3.89176e-05
COPZ1	1.91147	1.29969	2.81121	0.000995409
RPP30	0.387137	0.272481	0.550037	1.18431e-07
CCNA2	1.75135	1.51064	2.03042	1.09776e-13
RPA2	1.84007	1.40489	2.41006	9.45834e-06
RPS13	0.714722	0.604034	0.845693	9.14643e-05
CHAF1B	2.15637	1.77463	2.62022	1.07447e-14
C1orf131	1.80292	1.28467	2.53024	0.000652885
TAF6	1.988	1.36742	2.89021	0.00031944
CSE1L	2.38006	1.70307	3.32617	3.81658e-07
KIF11	1.53552	1.29426	1.82176	8.75958e-07
PSMD14	1.81933	1.33523	2.47895	0.000149687
PSMC4	2.70572	1.94211	3.76956	4.0196e-09
SPCS3	2.12356	1.56257	2.88595	1.49698e-06
RUVBL1	1.80791	1.29727	2.51956	0.000470836
CDK7	2.95357	2.02891	4.29965	1.57992e-08
RBM39	1.79831	1.30647	2.4753	0.000318421
SF3A3	2.47544	1.84815	3.31563	1.20752e-09
INTS9	2.30791	1.5731	3.38598	1.89794e-05
DDX49	1.57543	1.20505	2.05966	0.000887456
PSMB2	2.8035	2.00783	3.91448	1.42489e-09
DTL	1.56286	1.34792	1.81206	3.31374e-09
SYS1	1.96679	1.35241	2.86026	0.000400297
PSMB4	1.76234	1.38213	2.24714	4.87512e-06
CENPN	2.40553	1.9445	2.97588	6.17366e-16
CENPW	1.6075	1.33808	1.93116	3.94312e-07
LSM4	1.8195	1.45784	2.27088	1.19726e-07
COPA	1.97318	1.48873	2.61527	2.26319e-06
SNRPB2	1.90708	1.45661	2.49687	2.65809e-06
SUPT6H	3.00801	1.79723	5.03447	2.77791e-05
PSMD2	2.18293	1.58271	3.01077	1.94783e-06
XPO1	2.24452	1.60227	3.1442	2.58703e-06
SMC2	1.72594	1.34664	2.21207	1.62846e-05
PRPF38B	2.33925	1.79409	3.05006	3.43913e-10
DCTN2	1.65599	1.31429	2.08653	1.88745e-05
U2AF2	2.29021	1.6733	3.13456	2.28046e-07
CHMP2A	1.80816	1.46732	2.22816	2.72822e-08
AURKA	2.06761	1.73126	2.46931	1.06681e-15
SAP18	0.604584	0.464575	0.786788	0.000180989
BRIX1	1.77388	1.29341	2.43285	0.000376176
COPE	1.76573	1.32645	2.3505	9.79824e-05
CCT2	1.62789	1.30565	2.02966	1.49347e-05
RPL21	0.682953	0.567197	0.822332	5.71386e-05
NUP160	1.88492	1.38735	2.56094	5.04312e-05
ANKLE2	3.01933	1.91672	4.75623	1.87786e-06
ATR	2.54476	1.86911	3.46464	2.98036e-09
ZNF207	2.13112	1.48984	3.04845	3.43282e-05
RPS25	0.700732	0.596893	0.822635	1.38719e-05
ALG2	2.68962	1.94519	3.71892	2.17103e-09
SEC61G	1.41978	1.30449	1.54525	4.98785e-16
PREB	2.42753	1.69715	3.47223	1.19486e-06
ATP6V1F	1.77321	1.35871	2.31415	2.48207e-05
SPDL1	1.94945	1.42403	2.66874	3.09992e-05
DDX20	2.45143	1.7755	3.38468	5.09489e-08
CHAF1A	1.93876	1.58934	2.36501	6.60369e-11
GPN2	2.51857	1.67967	3.77646	7.85583e-06
CDT1	1.45311	1.22973	1.71707	1.14259e-05
INTS1	1.65464	1.26823	2.15878	0.000206378
TIMELESS	1.8357	1.52751	2.20608	9.31002e-11
KIF23	1.84621	1.58904	2.145	1.13519e-15
POLD3	3.05729	2.27214	4.11374	1.58729e-13
UTP20	3.68531	2.50905	5.413	2.93618e-11
YKT6	3.17492	2.27033	4.43994	1.45906e-11
CDK1	1.54713	1.35284	1.76932	1.84363e-10
GINS2	1.76695	1.4938	2.09006	3.05711e-11
PSMA4	1.68902	1.31063	2.17666	5.1172e-05
THOC3	1.76684	1.29443	2.41166	0.000336146
CDCA8	1.73212	1.51093	1.98569	3.25244e-15
SNAPC5	2.13141	1.48556	3.05805	3.97641e-05
NEDD1	2.50881	1.91463	3.2874	2.55944e-11
NCBP1	1.91775	1.3412	2.74215	0.000358299
NUF2	1.70458	1.47167	1.97434	1.12248e-12
PHB	2.22589	1.51143	3.27808	5.09232e-05
HAUS1	2.03938	1.58129	2.63018	4.01283e-08
PMPCB	1.83864	1.35075	2.50275	0.000108393
TUBA1B	1.69169	1.36615	2.09479	1.42777e-06
SNAPC1	1.5552	1.26303	1.91495	3.19125e-05
TRAPPC5	0.569056	0.448808	0.72152	3.24191e-06
CLP1	2.09128	1.47258	2.96991	3.74696e-05
ANAPC10	1.98614	1.38684	2.84441	0.000180704
PSMD12	3.23868	2.27254	4.61555	7.94841e-11
SNAPC2	2.4053	1.82406	3.17174	5.00414e-10
RPL7	0.627514	0.507298	0.776218	1.75e-05
CDC27	2.26578	1.48708	3.45223	0.000140738
NIP7	2.36771	1.67296	3.35097	1.15146e-06
NPLOC4	3.18011	2.03616	4.96673	3.65991e-07
POLR1A	1.96211	1.34467	2.86307	0.000472189
COPS6	1.68819	1.2926	2.20484	0.000121064
SRSF7	1.63174	1.26215	2.10956	0.000186459
RRM1	1.59182	1.25101	2.02547	0.000155662
ANAPC4	1.77499	1.37756	2.28707	9.13334e-06
WDHD1	2.25636	1.79292	2.83958	3.99756e-12
RPP40	2.00538	1.48031	2.71668	7.04188e-06
PSMB3	1.46576	1.19527	1.79746	0.000239027
MTBP	2.58291	1.96217	3.40002	1.32016e-11
RUVBL2	1.89696	1.44654	2.48762	3.6703e-06
GTF2B	1.70115	1.26194	2.29323	0.000488904
GTF2E2	2.58188	1.82203	3.6586	9.63467e-08
RPL4	0.577217	0.474706	0.701864	3.61444e-08
PSMD8	2.35392	1.74283	3.17928	2.37337e-08
COPB1	2.01874	1.48344	2.7472	7.87379e-06
EIF2S2	1.76569	1.29287	2.41142	0.000349881
RPS3	0.717741	0.589186	0.874345	0.000989647
RPL6	0.680044	0.540752	0.855216	0.000975785
RBM17	0.4956	0.362313	0.677921	1.12271e-05
MCM2	1.78904	1.50452	2.12738	4.64023e-11
KIF18A	2.42168	1.9831	2.95725	4.08854e-18
TXN	1.48854	1.24529	1.77932	1.2448e-05
NUP93	1.83833	1.36117	2.48276	7.15649e-05
UBE2I	1.86367	1.31493	2.64141	0.000467826
HYOU1	1.70822	1.2889	2.26397	0.000194609
RFC2	2.60564	2.04039	3.32749	1.64425e-14
DHX37	2.52761	1.7016	3.7546	4.37227e-06
TTC27	2.36869	1.57323	3.56637	3.62291e-05
TUBB	1.5534	1.21261	1.98998	0.000491333
TICRR	1.84249	1.43753	2.36153	1.39306e-06
SSU72	1.74067	1.36203	2.22457	9.47658e-06
ORC6	1.83462	1.51246	2.2254	7.30225e-10
GPN3	2.12022	1.50766	2.98167	1.56016e-05
ATP6V0B	1.8555	1.44952	2.37519	9.26374e-07
CNOT3	1.88984	1.48288	2.40848	2.68584e-07
LSM5	1.53374	1.30518	1.80232	2.04755e-07
RPS6	0.685409	0.589217	0.797306	9.78944e-07
GINS4	2.4966	1.99783	3.11988	8.53965e-16
PSMA5	2.19056	1.63199	2.94029	1.77657e-07
EEF2	0.629688	0.490898	0.807717	0.000271654
PCNA	1.85737	1.56764	2.20064	8.31956e-13
MCM4	1.82379	1.51703	2.1926	1.60361e-10
PRC1	1.68066	1.44122	1.95987	3.56993e-11
BUD31	1.67301	1.39441	2.00728	3.0697e-08
SAE1	2.07074	1.5218	2.81769	3.62372e-06
BIRC5	1.47333	1.31306	1.65315	4.24535e-11
CDC123	0.456472	0.330556	0.630351	1.91324e-06
MCM3	2.25683	1.79485	2.83773	3.27894e-12
GINS1	1.99213	1.63563	2.42634	7.34868e-12
RBBP4	1.84268	1.45972	2.32612	2.71845e-07
MCM5	2.14775	1.6785	2.74818	1.22067e-09
ORC1	1.87629	1.57107	2.24081	3.72849e-12
RAE1	2.33895	1.61394	3.38966	7.16959e-06
MRTO4	1.6493	1.24174	2.19063	0.000550154
NAPA	1.64457	1.29516	2.08824	4.45901e-05
TOP1	1.91915	1.41198	2.60848	3.13715e-05
PSMG3	1.51563	1.18633	1.93634	0.000877778
ARPC3	1.82909	1.43509	2.33127	1.06933e-06
WEE1	2.18964	1.88731	2.54041	4.73351e-25
DHX8	2.37453	1.63885	3.44046	4.8526e-06
AURKB	1.51375	1.34162	1.70796	1.67888e-11
RBBP5	1.74541	1.38999	2.19171	1.63046e-06
ACTR2	1.96293	1.40946	2.73374	6.58574e-05
RPL15	0.413352	0.309289	0.552429	2.36806e-09
POLR2C	2.04009	1.37555	3.02568	0.00039182
DPAGT1	1.93785	1.48228	2.53345	1.30945e-06
